# Supplementary material for: Multigenerational exposure of Ag materials (nano and salt) in soil – environmental hazards in Enchytraeus crypticus (Oligochaeta)
Source: Royal Society of Chemistry journal article supplement (doi:10.1039/d3na00487b), 2023-11-22
Supplement: d3na00487b1.pdf [file d3na00487b1.pdf]

## Supplementary information

### Multigenerational exposure of Ag materials (nano and salt) in soil – environmental hazards in *Enchytraeus crypticus* (Oligochaeta)

Fátima C.F. Santos<sup>a</sup>, Rudo A. Verweij<sup>b</sup>, Amadeu M.V.M. Soares<sup>a</sup>, Janeck J. Scott-Fordsmand<sup>c</sup>, Cornelis A.M. van Gestel<sup>b</sup>, Mónica J.B. Amorim<sup>a\*</sup>

<sup>a</sup>Department of Biology & CESAM, University of Aveiro, 3810-193 Aveiro, Portugal

<sup>b</sup>Amsterdam Institute for Life and Environment (A-LIFE), Faculty of Science, Vrije Universiteit Amsterdam, De Boelelaan 1085, 1081 HV Amsterdam, The Netherlands

<sup>c</sup> Department of Ecoscience, Aarhus University, C.F. Møllers Alle 4, DK-8000, Aarhus, Denmark

\*Corresponding author: [mjamorim@ua.pt](mailto:mjamorim@ua.pt)

**Table S1:** Soil pH (0.01 M CaCl<sub>2</sub>) measured at the start (t=0) and at the end (t=32) of each generation in a multigeneration test with *Enchytraeus crypticus* exposed in LUFA 2.2 soil spiked with AgNO<sub>3</sub> and Ag NM300K. F5 and F6 were exposed to clean soil.

| pH (CaCl <sub>2</sub> )              |     |     |     |     |     |     |     |     |     |     |     |     |     |     |
|--------------------------------------|-----|-----|-----|-----|-----|-----|-----|-----|-----|-----|-----|-----|-----|-----|
| Generation                           | F0  |     | F1  |     | F2  |     | F3  |     | F4  |     | F5  |     | F6  |     |
| Time (days)                          | 0   | 32  | 0   | 32  | 0   | 32  | 0   | 32  | 0   | 32  | 0   | 32  | 0   | 32  |
| AgNO <sub>3</sub> (mg Ag/kg soil DW) |     |     |     |     |     |     |     |     |     |     |     |     |     |     |
| 0                                    | 6.3 | 6.1 | 6.1 | 5.9 | 6.1 | 5.8 | 5.9 | 5.4 | 6.0 | 5.8 | 5.9 | 5.9 | 6.0 | 5.6 |
| 45                                   | 5.7 | 6.2 | 5.9 | 6.2 | 6.1 | 5.8 | 5.7 | 6.1 | 5.9 | 6.0 | 6.1 | 6.0 | 6.0 | 5.8 |
| 60                                   | 5.6 | 6.1 | 5.7 | 6.3 | 6.0 | 6.1 | 5.8 | 6.0 | 5.8 | 6.2 | 6.1 | 6.1 | 6.1 | 5.9 |
| Ag NM300K (mg Ag/kg soil DW)         |     |     |     |     |     |     |     |     |     |     |     |     |     |     |
| 0                                    | 5.8 | 5.6 | 6.0 | 6.0 | 6.0 | 6.0 | 6.0 | 6.3 | 6.2 | 5.9 | 6.1 | 5.7 | 6.0 | 6.0 |
| 20                                   | 5.8 | 6.1 | 6.0 | 6.3 | 6.1 | 6.3 | 6.1 | 6.2 | 6.1 | 6.1 | 6.1 | 6.0 | 6.1 | 6.2 |
| 60                                   | 5.8 | 6.1 | 6.1 | 6.1 | 6.0 | 6.1 | 6.0 | 6.2 | 6.1 | 6.1 | 6.2 | 6.1 | 6.1 | 6.1 |

**Table S2:** Measured total soil concentrations and internal Ag concentrations in the organisms (AV ± SE) measured at the end of each generation, so at days 32, 64, 96, 128, 160, 194 and 224 of the multigenerational tests with *Enchytraeus crypticus* in LUFA 2.2 soil spiked with AgNO<sub>3</sub> (45 and 60 mg Ag/kg soil DW) and Ag NM300K (20 and 60 mg Ag/kg soil DW). Also shown are the generation and effect level of exposure. [% Recovery]: recovery of Ag in the spiked soils compared to nominal concentrations of AgNO<sub>3</sub> and Ag NM300K. F5 and F6 were exposed to clean soil.

| Gene-ration | Time (days) | Effect level     | Measured total (mg/ kg soil DW)<br>[% recovery] | Internal conc. (mg Ag/kg body DW) | Measured total (mg/ kg soil DW)<br>[% recovery] | Internal conc. (mg Ag/kg body DW) |
|-------------|-------------|------------------|-------------------------------------------------|-----------------------------------|-------------------------------------------------|-----------------------------------|
|             |             |                  |                                                 | AgNO <sub>3</sub>                 | Ag NM300K                                       |                                   |
| <b>F0</b>   | 32          | Control          | 0                                               | 0.08±0.013                        | 0.05±0.05                                       | 0.13±0.02                         |
|             |             | EC <sub>10</sub> | 38.2±0.5<br>[84.9%]                             | 7.2±2.4                           | 20.3±0.5<br>[102%]                              | 7.9±1.1                           |
|             |             | EC <sub>50</sub> | 67.7±1.5<br>[113%]                              | 13.7±1.4                          | 57±3.2<br>[95%]                                 | 23.7±2.7                          |
| <b>F1</b>   | 64          | Control          | 0.05±0.05                                       | 0.07±0.02                         | 0.04 ± 0.04                                     | 0.20±0.03                         |
|             |             | EC <sub>10</sub> | 33.0±0.2<br>[73.0%]                             | 10.6±1.2                          | 17.1±0.1<br>[85.5%]                             | 6.6±0.9                           |
|             |             | EC <sub>50</sub> | 57.7±2.5<br>[91.2%]                             | 22.6±2.9                          | 58.3±1.6<br>[97.2%]                             | 17.6±3                            |
| <b>F2</b>   | 96          | Control          | 0                                               | 0.07 ± 0.02                       | 0.09 ± 0.003                                    | 0.2 ± 0.02                        |
|             |             | EC <sub>10</sub> | 35.1±3.2<br>[78.0%]                             | 17.6 ± 2.8                        | 50.2±0.4<br>[251%]                              | 15.2 ± 1.4                        |
|             |             | EC <sub>50</sub> | 63.2±3.6<br>[105%]                              | 16.6 ± 4.5                        | 47.6±1.8<br>[79.3%]                             | 81.3 ± 20.9                       |
| <b>F3</b>   | 128         | Control          | 0                                               | 0.12±0.03                         | 0.13±0.04                                       | 0.00                              |
|             |             | EC <sub>10</sub> | 26.0±0.9<br>[57.7%]                             | 19.9±1.7                          | 16.9±0.4<br>[84.5%]                             | 7.8 ± 0.6                         |
|             |             | EC <sub>50</sub> | 47.5±0.65<br>[79.1%]                            | 21.7±2.2                          | 53.0±0.7<br>[88.3%]                             | 28.1 ± 1.8                        |
| <b>F4</b>   | 160         | Control          | 0.68±0.13                                       | 0.09±0.02                         | 0.04±0.04                                       | 0.07 ± 0.02                       |
|             |             | EC <sub>10</sub> | 50.3±5.0<br>[112%]                              | 8.2±2.2                           | 22.8±0.4<br>[114%]                              | 11.4 ± 1.3                        |
|             |             | EC <sub>50</sub> | 52.4±0.09<br>[87.3%]                            | 13.1±1.3                          | 59.5±1.02<br>[99.1%]                            | 35.6 ± 5.3                        |
| <b>F5</b>   | 192         | Control          | 0.09±0.001                                      | 0.06 ± 0.01                       | 0.05 ± 0.05                                     | 0.12±0.007                        |
|             |             | 0                | 0.13±0.3                                        | 0.09 ± 0.02                       | 0.0                                             | 0.15±0.03                         |
|             |             | 0                | 0.09±0.1                                        | 0.03 ± 0.01                       | 0.14 ± 0.13                                     | 0.41±0.07                         |
| <b>F6</b>   | 224         | Control          | 0                                               | 0.05±0.003                        | 0.05±0.05                                       | 0.05±0.009                        |
|             |             | 0                | 0                                               | 0.09±0.007                        | 0.0                                             | 0.02±0.008                        |
|             |             | 0                | 0                                               | 0.06±0.01                         | 0.05±0.05                                       | 0.04±0.008                        |

**Table S3.** Detailed information regarding control performance of *Enchytraeus crypticus* at each generation of the multigenerational exposure in LUFA 2.2 soil to AgNO<sub>3</sub> and Ag NM300K, including the survival fraction, numbers of juveniles. AV±SD: Average ± Standard Deviation. CoV: coefficient of variation. F5 and F6 were exposed to clean soil.

| Generation                   | Time (days) | Survival fraction (%) | CoV no. Adults (Survival) (%) | Number of juveniles (AV±SD) | CoV no. Juveniles (Reproduction) (%) |
|------------------------------|-------------|-----------------------|-------------------------------|-----------------------------|--------------------------------------|
| AgNO <sub>3</sub> experiment |             |                       |                               |                             |                                      |
| F0                           | 32          | 98 ± 0.04             | 4                             | 3310 ± 549                  | 18                                   |
| F1                           | 64          | 93 ± 0.05             | 5                             | 5250 ± 298                  | 6                                    |
| F2                           | 96          | 90 ± 0.07             | 8                             | 3061 ± 308                  | 10                                   |
| F3                           | 128         | 89 ± 0.09             | 10                            | 3211 ± 345                  | 10                                   |
| F4                           | 160         | 97 ± 0.06             | 6                             | 4528 ± 620                  | 14                                   |
| F5                           | 194         | 91 ± 0.17             | 20                            | 4564 ± 621                  | 14                                   |
| F6                           | 224         | 97 ± 0.06             | 6                             | 2700 ± 398                  | 15                                   |
| Ag NM300K experiment         |             |                       |                               |                             |                                      |
| F0                           | 32          | 93 ± 0.06             | 7                             | 3909 ± 355                  | 10                                   |
| F1                           | 64          | 94 ± 0.02             | 2                             | 3200 ± 357                  | 10                                   |
| F2                           | 96          | 93 ± 0.03             | 3                             | 2920 ± 251                  | 9                                    |
| F3                           | 128         | 95 ± 0.1              | 10                            | 4353 ± 466                  | 10                                   |
| F4                           | 160         | 96 ± 0.04             | 5                             | 4460 ± 723                  | 20                                   |
| F5                           | 194         | 94 ± 0.05             | 5                             | 3640 ± 854                  | 20                                   |
| F6                           | 224         | 93 ± 0.1              | 10                            | 2473 ± 428                  | 20                                   |
